# Supplementary material for: Isolation and characterization of a uranium(VI)–nitride triple bond
Source: Springer Nature journal article supplement (doi:10.1038/nchem.1642), 2013-05-03
Supplement: 41557_2013_BFnchem1642_MOESM12_ESM.mol [file 41557_2013_BFnchem1642_MOESM12_ESM.mol]

  ChemDraw04181311032D

 42 39  0  0  0  0  0  0  0  0999 V2000
   -1.4816    1.1636    0.0000 C   0  0  0  0  0  0  0  0  0  0  0  0
   -0.7862    1.3547    0.0000 C   0  0  0  0  0  0  0  0  0  0  0  0
    0.6983    1.2273    0.0000 Si  0  0  0  0  0  0  0  0  0  0  0  0
   -0.7437   -1.0748    0.0000 N   0  5  0  0  0  0  0  0  0  0  0  0
   -0.0300    0.6303    0.0000 N   0  5  0  0  0  0  0  0  0  0  0  0
   -1.0702    1.9354    0.0000 Si  0  0  0  0  0  0  0  0  0  0  0  0
   -0.6186   -1.9349    0.0000 Si  0  0  0  0  0  0  0  0  0  0  0  0
   -1.7756    0.7699    0.0000 C   0  0  0  0  0  0  0  0  0  0  0  0
   -2.0139    0.4217    0.0000 C   0  0  0  0  0  0  0  0  0  0  0  0
   -1.9146   -0.2465    0.0000 N   0  0  0  0  0  0  0  0  0  0  0  0
   -1.5091   -1.1801    0.0000 C   0  0  0  0  0  0  0  0  0  0  0  0
   -2.1016   -0.8259    0.0000 C   0  0  0  0  0  0  0  0  0  0  0  0
   -0.9842    0.7953    0.0000 N   0  5  0  0  0  0  0  0  0  0  0  0
    1.0509    1.8457    0.0000 C   0  0  0  0  0  0  0  0  0  0  0  0
    1.7243    1.1882    0.0000 C   0  0  0  0  0  0  0  0  0  0  0  0
    1.1543    0.5398    0.0000 C   0  0  0  0  0  0  0  0  0  0  0  0
   -1.8952    1.9354    0.0000 C   0  0  0  0  0  0  0  0  0  0  0  0
   -0.3557    2.3479    0.0000 C   0  0  0  0  0  0  0  0  0  0  0  0
   -1.1848    2.7318    0.0000 C   0  0  0  0  0  0  0  0  0  0  0  0
   -0.4051   -2.7318    0.0000 C   0  0  0  0  0  0  0  0  0  0  0  0
   -1.3331   -2.3474    0.0000 C   0  0  0  0  0  0  0  0  0  0  0  0
    0.2355   -1.8908    0.0000 C   0  0  0  0  0  0  0  0  0  0  0  0
    0.8189   -2.4742    0.0000 C   0  0  0  0  0  0  0  0  0  0  0  0
    0.6480   -1.1763    0.0000 C   0  0  0  0  0  0  0  0  0  0  0  0
    0.3918   -2.9453    0.0000 C   0  0  0  0  0  0  0  0  0  0  0  0
   -0.9884   -3.3151    0.0000 C   0  0  0  0  0  0  0  0  0  0  0  0
   -2.0475   -1.9349    0.0000 C   0  0  0  0  0  0  0  0  0  0  0  0
   -1.3331   -3.1724    0.0000 C   0  0  0  0  0  0  0  0  0  0  0  0
    0.3587    1.9354    0.0000 C   0  0  0  0  0  0  0  0  0  0  0  0
   -1.9817    2.9452    0.0000 C   0  0  0  0  0  0  0  0  0  0  0  0
   -0.1422    3.1448    0.0000 C   0  0  0  0  0  0  0  0  0  0  0  0
   -0.6014    3.3151    0.0000 C   0  0  0  0  0  0  0  0  0  0  0  0
   -2.3077    2.6499    0.0000 C   0  0  0  0  0  0  0  0  0  0  0  0
   -2.3077    1.2209    0.0000 C   0  0  0  0  0  0  0  0  0  0  0  0
    0.8374    2.6426    0.0000 C   0  0  0  0  0  0  0  0  0  0  0  0
    1.8478    2.0593    0.0000 C   0  0  0  0  0  0  0  0  0  0  0  0
    2.3077    0.6048    0.0000 C   0  0  0  0  0  0  0  0  0  0  0  0
    2.1504    1.8947    0.0000 C   0  0  0  0  0  0  0  0  0  0  0  0
    0.7869   -0.1989    0.0000 C   0  0  0  0  0  0  0  0  0  0  0  0
    1.9777    0.5910    0.0000 C   0  0  0  0  0  0  0  0  0  0  0  0
    0.1478   -0.2124    0.0000 F   0  5  0  0  0  0  0  0  0  0  0  0
   -0.7287   -0.2411    0.0000 U   0  0  0  0  0  0  0  0  0  0  0  0
 10  1  1  0      
  1  2  1  0      
  2  5  1  0      
  5  3  1  0      
 13  6  1  0      
  4  7  1  0      
 13  8  1  0      
  8  9  1  0      
  9 10  1  0      
 12 11  1  0      
 11  4  1  0      
 10 12  1  0      
  3 14  1  0      
  3 15  1  0      
  3 16  1  0      
  6 17  1  0      
  6 18  1  0      
  6 19  1  0      
  7 20  1  0      
  7 21  1  0      
  7 22  1  0      
 22 23  1  0      
 22 24  1  0      
 20 25  1  0      
 20 26  1  0      
 21 27  1  0      
 21 28  1  0      
 18 29  1  0      
 19 30  1  0      
 18 31  1  0      
 19 32  1  0      
 17 33  1  0      
 17 34  1  0      
 14 35  1  0      
 14 36  1  0      
 15 37  1  0      
 15 38  1  0      
 16 39  1  0      
 16 40  1  0      
M  CHG  5   4  -1   5  -1  13  -1  41  -1  42   4
M  END
