# Supplementary material for: Isolation and characterization of a uranium(VI)–nitride triple bond
Source: Springer Nature journal article supplement (doi:10.1038/nchem.1642), 2013-05-03
Supplement: 41557_2013_BFnchem1642_MOESM20_ESM.cif [file 41557_2013_BFnchem1642_MOESM20_ESM.cif]

 
data_9 


_refine_special_details 
; 
The alpha nitrogen of the azide was treated with approximate isoptropy. 
The reason for this is obviously the nonspherical electron distribution of the 
azide unit, which cannot be adequately modelled with spherical 
scattering factors. A similar situation is well known from 
metal-carbonyl complexes (Braga & Koetzle, 1988), and has also 
been observed for metal-acetonitrile complexes (Lutz et. al. 2009).
Braga, D. & Koetzle, T. F. (1988). Acta Cryst. B44, 151-156.
Lutz, M., Schreurs, M. M., Spek, A. L., Moelands, M. A. H., Klein, 
R. J. M. (2010). Acta Cryst. C66, m9-m12.
; 
 
 
_audit_creation_method            SHELXL-97 
_chemical_name_systematic 
; 
 ? 
; 
_chemical_name_common             ? 
_chemical_melting_point           ? 
_chemical_formula_moiety          'C33 H75 N7 Si3 U' 
_chemical_formula_sum             'C33 H75 N7 Si3 U' 
_chemical_formula_weight          892.30 
 
loop_ 
 _atom_type_symbol 
 _atom_type_description 
 _atom_type_scat_dispersion_real 
 _atom_type_scat_dispersion_imag 
 _atom_type_scat_source 
 'C'  'C'   0.0181   0.0091 
 'International Tables Vol C Tables 4.2.6.8 and 6.1.1.4' 
 'H'  'H'   0.0000   0.0000 
 'International Tables Vol C Tables 4.2.6.8 and 6.1.1.4' 
 'N'  'N'   0.0311   0.0180 
 'International Tables Vol C Tables 4.2.6.8 and 6.1.1.4' 
 'Si'  'Si'   0.2541   0.3302 
 'International Tables Vol C Tables 4.2.6.8 and 6.1.1.4' 
 'U'  'U'  -4.3638  13.4090 
 'International Tables Vol C Tables 4.2.6.8 and 6.1.1.4' 
 
_symmetry_cell_setting            monoclinic
_symmetry_space_group_name_H-M    'P 21/n'
_symmetry_space_group_name_Hall   '-P 2yn'

 
loop_ 
 _symmetry_equiv_pos_as_xyz 
 'x, y, z' 
 '-x+1/2, y+1/2, -z+1/2' 
 '-x, -y, -z' 
 'x-1/2, -y-1/2, z-1/2' 
 
_cell_length_a                    11.2262(2) 
_cell_length_b                    20.8793(4) 
_cell_length_c                    18.2495(3) 
_cell_angle_alpha                 90.00 
_cell_angle_beta                  93.5901(17) 
_cell_angle_gamma                 90.00 
_cell_volume                      4269.19(15) 
_cell_formula_units_Z             4 
_cell_measurement_temperature     90(2) 
_cell_measurement_reflns_used     9399
_cell_measurement_theta_min       3.94
_cell_measurement_theta_max       74.42
 
_exptl_crystal_description        Block 
_exptl_crystal_colour             yellow 
_exptl_crystal_size_max           0.1226 
_exptl_crystal_size_mid           0.1084
_exptl_crystal_size_min           0.0691 
_exptl_crystal_density_meas       ? 
_exptl_crystal_density_diffrn     1.388 
_exptl_crystal_density_method     'not measured' 
_exptl_crystal_F_000              1824 
_exptl_absorpt_coefficient_mu     11.725 
_exptl_absorpt_correction_type    'gaussian' 
_exptl_absorpt_correction_T_min   0.389 
_exptl_absorpt_correction_T_max   0.602 
_exptl_absorpt_process_details    ? 
 
_exptl_special_details 
;
CrysAlisPro, Agilent Technologies,
Version 1.171.35.15 (release 03-08-2011 CrysAlis171 .NET)
(compiled Aug  3 2011,13:03:54)
Numerical absorption correction based on gaussian integration over
			a multifaceted crystal model
;
 
_diffrn_ambient_temperature       90(2) 
_diffrn_radiation_wavelength      1.54184 
_diffrn_radiation_type            'Cu K\a' 
_diffrn_radiation_source          'SuperNova (Cu) X-ray Source'
_diffrn_radiation_monochromator   'mirror'
_diffrn_measurement_device_type   'SuperNova, Single source at offset), Atlas'
_diffrn_measurement_method        '\w scans'
_diffrn_detector_area_resol_mean  10.3613
_diffrn_standards_number          0
_diffrn_standards_interval_count  . 
_diffrn_standards_interval_time   ? 
_diffrn_standards_decay_%         0 
_diffrn_reflns_number             19764 
_diffrn_reflns_av_R_equivalents   0.0307 
_diffrn_reflns_av_sigmaI/netI     0.0354 
_diffrn_reflns_limit_h_min        -14 
_diffrn_reflns_limit_h_max        13 
_diffrn_reflns_limit_k_min        -24 
_diffrn_reflns_limit_k_max        25 
_diffrn_reflns_limit_l_min        -15 
_diffrn_reflns_limit_l_max        22 
_diffrn_reflns_theta_min          4.23 
_diffrn_reflns_theta_max          74.59 
_reflns_number_total              8519 
_reflns_number_gt                 7726 
_reflns_threshold_expression      I>2\s(I) 
 
_computing_data_collection       
;
CrysAlisPro, Agilent Technologies,
Version 1.171.35.15 (release 03-08-2011 CrysAlis171 .NET)
(compiled Aug  3 2011,13:03:54)
;
_computing_cell_refinement       
;
CrysAlisPro, Agilent Technologies,
Version 1.171.35.15 (release 03-08-2011 CrysAlis171 .NET)
(compiled Aug  3 2011,13:03:54)
;
_computing_data_reduction        
;
CrysAlisPro, Agilent Technologies,
Version 1.171.35.15 (release 03-08-2011 CrysAlis171 .NET)
(compiled Aug  3 2011,13:03:54)
;
_computing_structure_solution    'SHELXTL (Sheldrick, 2008)' 
_computing_structure_refinement  'SHELXL97 (Sheldrick, 2008)'
_computing_molecular_graphics    'SHELXTL (Sheldrick, 2008)' 
_computing_publication_material  
'enCIFer (Allen et al., 2004); PLATON (Spek, 2009)'
 

_refine_ls_structure_factor_coef  Fsqd  
_refine_ls_matrix_type            full 
_refine_ls_weighting_scheme       calc  
_refine_ls_weighting_details 
 'calc w=1/[\s^2^(Fo^2^)+(0.0392P)^2^+0.0000P] where P=(Fo^2^+2Fc^2^)/3' 
_atom_sites_solution_primary      direct 
_atom_sites_solution_secondary    difmap 
_atom_sites_solution_hydrogens    'geom, Me from difmap' 
_refine_ls_hydrogen_treatment     constr 
_refine_ls_extinction_method      none 
_refine_ls_extinction_coef        ? 
_refine_ls_number_reflns          8519 
_refine_ls_number_parameters      415 
_refine_ls_number_restraints      6 
_refine_ls_R_factor_all           0.0295 
_refine_ls_R_factor_gt            0.0259 
_refine_ls_wR_factor_ref          0.0676 
_refine_ls_wR_factor_gt           0.0658 
_refine_ls_goodness_of_fit_ref    1.046 
_refine_ls_restrained_S_all       1.050 
_refine_ls_shift/su_max           0.006 
_refine_ls_shift/su_mean          0.000 
 
loop_ 
 _atom_site_label 
 _atom_site_type_symbol 
 _atom_site_fract_x 
 _atom_site_fract_y 
 _atom_site_fract_z 
 _atom_site_U_iso_or_equiv 
 _atom_site_adp_type 
 _atom_site_occupancy 
 _atom_site_symmetry_multiplicity 
 _atom_site_calc_flag 
 _atom_site_refinement_flags 
 _atom_site_disorder_assembly 
 _atom_site_disorder_group 
U1 U 0.781360(8) 0.794411(4) 0.540186(5) 0.00908(5) Uani 1 1 d . . . 
N1 N 0.8548(2) 0.86048(13) 0.45760(14) 0.0122(5) Uani 1 1 d . . . 
N2 N 0.8329(2) 0.82540(13) 0.65604(14) 0.0128(5) Uani 1 1 d . . . 
N3 N 0.8530(2) 0.69596(13) 0.51905(15) 0.0122(5) Uani 1 1 d . . . 
N4 N 1.0141(3) 0.79770(12) 0.55772(15) 0.0137(6) Uani 1 1 d . . . 
N5 N 0.5764(3) 0.79945(13) 0.52285(17) 0.0158(6) Uani 1 1 d U . . 
N6 N 0.4705(3) 0.80002(19) 0.51779(19) 0.0304(8) Uani 1 1 d . . . 
N7 N 0.3668(4) 0.7997(3) 0.5131(3) 0.0709(19) Uani 1 1 d . . . 
Si1 Si 0.77906(7) 0.88406(4) 0.37557(4) 0.01122(15) Uani 1 1 d . . . 
Si2 Si 0.75369(7) 0.86974(4) 0.71817(4) 0.01218(16) Uani 1 1 d . . . 
Si3 Si 0.78081(7) 0.62249(4) 0.52804(5) 0.01319(17) Uani 1 1 d . . . 
C1 C 0.6696(3) 0.81672(16) 0.35035(18) 0.0146(6) Uani 1 1 d . . . 
H1 H 0.6421 0.8001 0.3978 0.018 Uiso 1 1 calc R . . 
C2 C 0.5572(3) 0.8379(2) 0.3053(2) 0.0265(8) Uani 1 1 d . . . 
H2A H 0.5017 0.8018 0.2995 0.040 Uiso 1 1 calc R . . 
H2B H 0.5787 0.8525 0.2569 0.040 Uiso 1 1 calc R . . 
H2C H 0.5190 0.8730 0.3307 0.040 Uiso 1 1 calc R . . 
C3 C 0.7280(4) 0.75964(17) 0.3133(2) 0.0230(7) Uani 1 1 d . . . 
H3A H 0.6712 0.7240 0.3087 0.035 Uiso 1 1 calc R . . 
H3B H 0.7992 0.7462 0.3432 0.035 Uiso 1 1 calc R . . 
H3C H 0.7509 0.7723 0.2645 0.035 Uiso 1 1 calc R . . 
C4 C 0.8840(3) 0.90126(15) 0.30033(18) 0.0151(6) Uani 1 1 d . . . 
H4 H 0.9282 0.9411 0.3156 0.018 Uiso 1 1 calc R . . 
C5 C 0.9798(3) 0.85019(18) 0.2883(2) 0.0227(7) Uani 1 1 d . . . 
H5A H 1.0381 0.8673 0.2556 0.034 Uiso 1 1 calc R . . 
H5B H 0.9419 0.8120 0.2661 0.034 Uiso 1 1 calc R . . 
H5C H 1.0204 0.8388 0.3356 0.034 Uiso 1 1 calc R . . 
C6 C 0.8144(3) 0.91726(19) 0.22743(19) 0.0221(7) Uani 1 1 d . . . 
H6A H 0.8702 0.9317 0.1916 0.033 Uiso 1 1 calc R . . 
H6B H 0.7566 0.9513 0.2355 0.033 Uiso 1 1 calc R . . 
H6C H 0.7722 0.8790 0.2087 0.033 Uiso 1 1 calc R . . 
C7 C 0.6935(3) 0.96103(16) 0.38781(18) 0.0164(6) Uani 1 1 d . . . 
H7 H 0.6455 0.9692 0.3408 0.020 Uiso 1 1 calc R . . 
C8 C 0.7763(4) 1.01901(19) 0.4017(3) 0.0315(9) Uani 1 1 d . . . 
H8A H 0.7282 1.0572 0.4101 0.047 Uiso 1 1 calc R . . 
H8B H 0.8232 1.0259 0.3589 0.047 Uiso 1 1 calc R . . 
H8C H 0.8302 1.0109 0.4450 0.047 Uiso 1 1 calc R . . 
C9 C 0.6063(4) 0.9573(2) 0.4484(2) 0.0291(8) Uani 1 1 d . . . 
H9A H 0.5605 0.9972 0.4495 0.044 Uiso 1 1 calc R . . 
H9B H 0.6506 0.9510 0.4958 0.044 Uiso 1 1 calc R . . 
H9C H 0.5516 0.9212 0.4388 0.044 Uiso 1 1 calc R . . 
C10 C 0.9736(3) 0.88956(16) 0.47649(18) 0.0144(6) Uani 1 1 d . . . 
H10A H 0.9681 0.9199 0.5179 0.017 Uiso 1 1 calc R . . 
H10B H 1.0008 0.9135 0.4338 0.017 Uiso 1 1 calc R . . 
C11 C 1.0618(3) 0.83672(15) 0.49777(18) 0.0141(6) Uani 1 1 d . . . 
H11A H 1.0740 0.8092 0.4547 0.017 Uiso 1 1 calc R . . 
H11B H 1.1396 0.8556 0.5146 0.017 Uiso 1 1 calc R . . 
C12 C 0.5916(3) 0.87255(16) 0.68246(18) 0.0172(6) Uani 1 1 d . . . 
H12 H 0.5914 0.8778 0.6280 0.021 Uiso 1 1 calc R . . 
C13 C 0.5213(4) 0.92953(19) 0.7115(2) 0.0269(8) Uani 1 1 d . . . 
H13A H 0.4385 0.9276 0.6912 0.040 Uiso 1 1 calc R . . 
H13B H 0.5578 0.9697 0.6966 0.040 Uiso 1 1 calc R . . 
H13C H 0.5229 0.9275 0.7652 0.040 Uiso 1 1 calc R . . 
C14 C 0.5235(3) 0.81008(19) 0.6965(2) 0.0224(7) Uani 1 1 d . . . 
H14A H 0.4451 0.8114 0.6697 0.034 Uiso 1 1 calc R . . 
H14B H 0.5132 0.8056 0.7491 0.034 Uiso 1 1 calc R . . 
H14C H 0.5690 0.7735 0.6794 0.034 Uiso 1 1 calc R . . 
C15 C 0.7763(3) 0.83487(16) 0.81432(17) 0.0155(6) Uani 1 1 d . . . 
H15 H 0.8631 0.8401 0.8288 0.019 Uiso 1 1 calc R . . 
C16 C 0.7094(3) 0.87222(17) 0.87193(18) 0.0223(7) Uani 1 1 d . . . 
H16A H 0.7346 0.8567 0.9212 0.033 Uiso 1 1 calc R . . 
H16B H 0.6232 0.8657 0.8629 0.033 Uiso 1 1 calc R . . 
H16C H 0.7278 0.9180 0.8683 0.033 Uiso 1 1 calc R . . 
C17 C 0.7502(3) 0.76297(17) 0.8208(2) 0.0222(7) Uani 1 1 d . . . 
H17A H 0.7792 0.7477 0.8694 0.033 Uiso 1 1 calc R . . 
H17B H 0.7907 0.7396 0.7830 0.033 Uiso 1 1 calc R . . 
H17C H 0.6639 0.7557 0.8140 0.033 Uiso 1 1 calc R . . 
C18 C 0.8079(3) 0.95594(16) 0.72524(18) 0.0196(7) Uani 1 1 d . . . 
H18 H 0.7494 0.9794 0.7545 0.024 Uiso 1 1 calc R . . 
C19 C 0.8058(4) 0.98919(18) 0.6497(2) 0.0267(8) Uani 1 1 d . . . 
H19A H 0.8247 1.0347 0.6565 0.040 Uiso 1 1 calc R . . 
H19B H 0.7263 0.9848 0.6249 0.040 Uiso 1 1 calc R . . 
H19C H 0.8651 0.9692 0.6198 0.040 Uiso 1 1 calc R . . 
C20 C 0.9304(4) 0.96517(19) 0.7656(2) 0.0263(8) Uani 1 1 d . . . 
H20A H 0.9491 1.0110 0.7687 0.039 Uiso 1 1 calc R . . 
H20B H 0.9912 0.9431 0.7388 0.039 Uiso 1 1 calc R . . 
H20C H 0.9292 0.9473 0.8152 0.039 Uiso 1 1 calc R . . 
C21 C 0.9561(3) 0.80774(16) 0.68399(18) 0.0143(6) Uani 1 1 d . . . 
H21A H 0.9606 0.7609 0.6922 0.017 Uiso 1 1 calc R . . 
H21B H 0.9752 0.8293 0.7316 0.017 Uiso 1 1 calc R . . 
C22 C 1.0459(3) 0.82719(15) 0.62987(17) 0.0143(6) Uani 1 1 d . . . 
H22A H 1.0468 0.8744 0.6250 0.017 Uiso 1 1 calc R . . 
H22B H 1.1267 0.8131 0.6479 0.017 Uiso 1 1 calc R . . 
C23 C 0.6146(3) 0.64006(17) 0.52705(18) 0.0173(6) Uani 1 1 d . . . 
H23 H 0.6064 0.6798 0.5568 0.021 Uiso 1 1 calc R . . 
C24 C 0.5398(3) 0.5884(2) 0.5630(2) 0.0252(8) Uani 1 1 d . . . 
H24A H 0.4552 0.6002 0.5576 0.038 Uiso 1 1 calc R . . 
H24B H 0.5649 0.5850 0.6152 0.038 Uiso 1 1 calc R . . 
H24C H 0.5515 0.5471 0.5389 0.038 Uiso 1 1 calc R . . 
C25 C 0.5575(3) 0.65507(19) 0.4500(2) 0.0235(7) Uani 1 1 d . . . 
H25A H 0.4763 0.6712 0.4543 0.035 Uiso 1 1 calc R . . 
H25B H 0.5548 0.6160 0.4202 0.035 Uiso 1 1 calc R . . 
H25C H 0.6052 0.6876 0.4265 0.035 Uiso 1 1 calc R . . 
C26 C 0.8227(3) 0.58343(16) 0.62012(18) 0.0167(6) Uani 1 1 d . . . 
H26 H 0.7705 0.5449 0.6242 0.020 Uiso 1 1 calc R . . 
C27 C 0.7962(3) 0.62888(18) 0.68354(19) 0.0210(7) Uani 1 1 d . . . 
H27A H 0.8146 0.6072 0.7305 0.031 Uiso 1 1 calc R . . 
H27B H 0.7117 0.6409 0.6795 0.031 Uiso 1 1 calc R . . 
H27C H 0.8455 0.6674 0.6809 0.031 Uiso 1 1 calc R . . 
C28 C 0.9526(3) 0.56046(18) 0.6293(2) 0.0240(7) Uani 1 1 d . . . 
H28A H 0.9693 0.5444 0.6793 0.036 Uiso 1 1 calc R . . 
H28B H 1.0062 0.5963 0.6203 0.036 Uiso 1 1 calc R . . 
H28C H 0.9652 0.5261 0.5941 0.036 Uiso 1 1 calc R . . 
C29 C 0.8240(3) 0.56393(16) 0.45496(18) 0.0174(6) Uani 1 1 d . . . 
H29 H 0.9100 0.5535 0.4667 0.021 Uiso 1 1 calc R . . 
C30 C 0.7560(4) 0.49998(18) 0.4583(2) 0.0255(8) Uani 1 1 d . . . 
H30A H 0.7908 0.4689 0.4256 0.038 Uiso 1 1 calc R . . 
H30B H 0.6719 0.5068 0.4427 0.038 Uiso 1 1 calc R . . 
H30C H 0.7621 0.4836 0.5087 0.038 Uiso 1 1 calc R . . 
C31 C 0.8159(4) 0.58944(18) 0.37610(19) 0.0235(7) Uani 1 1 d . . . 
H31A H 0.8497 0.5578 0.3435 0.035 Uiso 1 1 calc R . . 
H31B H 0.8608 0.6296 0.3740 0.035 Uiso 1 1 calc R . . 
H31C H 0.7321 0.5972 0.3603 0.035 Uiso 1 1 calc R . . 
C32 C 0.9796(3) 0.69275(16) 0.49972(19) 0.0152(6) Uani 1 1 d . . . 
H32A H 0.9867 0.7104 0.4498 0.018 Uiso 1 1 calc R . . 
H32B H 1.0061 0.6475 0.4996 0.018 Uiso 1 1 calc R . . 
C33 C 1.0585(3) 0.73059(15) 0.55450(19) 0.0149(6) Uani 1 1 d . . . 
H33A H 1.0576 0.7106 0.6036 0.018 Uiso 1 1 calc R . . 
H33B H 1.1418 0.7304 0.5395 0.018 Uiso 1 1 calc R . . 
 
loop_ 
 _atom_site_aniso_label 
 _atom_site_aniso_U_11 
 _atom_site_aniso_U_22 
 _atom_site_aniso_U_33 
 _atom_site_aniso_U_23 
 _atom_site_aniso_U_13 
 _atom_site_aniso_U_12 
U1 0.00642(7) 0.01139(7) 0.00930(7) -0.00009(3) -0.00058(4) -0.00081(3) 
N1 0.0084(12) 0.0158(12) 0.0123(12) 0.0017(10) 0.0008(9) -0.0025(9) 
N2 0.0096(12) 0.0170(13) 0.0117(12) -0.0006(10) -0.0017(10) 0.0004(10) 
N3 0.0106(12) 0.0109(11) 0.0154(13) -0.0033(10) 0.0021(10) -0.0007(9) 
N4 0.0189(14) 0.0112(13) 0.0107(13) -0.0001(9) -0.0006(11) -0.0005(10) 
N5 0.0091(9) 0.0201(9) 0.0182(9) -0.0007(7) 0.0014(7) -0.0007(7) 
N6 0.0167(17) 0.051(2) 0.0233(17) -0.0094(15) -0.0008(13) 0.0012(14) 
N7 0.0103(19) 0.142(6) 0.060(3) -0.031(3) 0.0001(18) 0.005(2) 
Si1 0.0101(4) 0.0126(4) 0.0108(4) 0.0007(3) -0.0003(3) 0.0009(3) 
Si2 0.0137(4) 0.0121(4) 0.0108(4) -0.0003(3) 0.0011(3) -0.0005(3) 
Si3 0.0138(4) 0.0137(4) 0.0121(4) -0.0018(3) 0.0011(3) -0.0032(3) 
C1 0.0122(14) 0.0186(15) 0.0127(14) 0.0007(12) -0.0031(12) -0.0045(12) 
C2 0.0175(17) 0.0300(19) 0.030(2) -0.0050(16) -0.0104(15) -0.0037(14) 
C3 0.033(2) 0.0161(15) 0.0197(17) -0.0046(13) 0.0000(14) -0.0055(14) 
C4 0.0127(14) 0.0164(15) 0.0165(15) 0.0029(12) 0.0029(12) 0.0025(11) 
C5 0.0227(17) 0.0230(17) 0.0235(17) 0.0017(14) 0.0087(14) 0.0050(14) 
C6 0.0209(17) 0.0299(19) 0.0158(16) 0.0050(14) 0.0023(13) 0.0006(14) 
C7 0.0144(15) 0.0184(15) 0.0162(15) -0.0012(12) 0.0001(12) 0.0036(12) 
C8 0.0269(19) 0.0184(17) 0.049(2) -0.0089(17) 0.0025(17) 0.0022(15) 
C9 0.029(2) 0.032(2) 0.0273(19) -0.0002(16) 0.0115(16) 0.0065(16) 
C10 0.0101(14) 0.0151(14) 0.0176(15) 0.0016(12) -0.0019(11) -0.0041(12) 
C11 0.0097(14) 0.0158(14) 0.0164(15) 0.0017(12) -0.0009(12) -0.0028(11) 
C12 0.0174(15) 0.0191(16) 0.0151(15) 0.0004(12) 0.0016(12) 0.0030(12) 
C13 0.0268(19) 0.0248(18) 0.0290(19) 0.0013(15) 0.0008(15) 0.0119(15) 
C14 0.0170(16) 0.0302(18) 0.0201(17) 0.0029(15) 0.0008(13) -0.0029(14) 
C15 0.0137(14) 0.0201(16) 0.0126(14) -0.0004(12) -0.0004(12) -0.0018(12) 
C16 0.0315(19) 0.0229(17) 0.0132(15) -0.0012(13) 0.0063(14) 0.0000(14) 
C17 0.0266(18) 0.0189(16) 0.0209(17) 0.0035(14) 0.0004(14) -0.0004(14) 
C18 0.0301(18) 0.0130(15) 0.0164(16) -0.0023(12) 0.0059(14) -0.0045(13) 
C19 0.042(2) 0.0191(17) 0.0195(17) 0.0028(14) 0.0078(16) -0.0052(15) 
C20 0.034(2) 0.0233(18) 0.0213(17) -0.0035(14) 0.0020(15) -0.0157(15) 
C21 0.0117(15) 0.0161(14) 0.0142(15) -0.0007(12) -0.0064(12) 0.0039(12) 
C22 0.0119(14) 0.0155(14) 0.0152(15) -0.0012(12) -0.0015(12) -0.0013(11) 
C23 0.0133(15) 0.0223(16) 0.0165(15) -0.0022(13) 0.0013(12) -0.0047(12) 
C24 0.0195(17) 0.0330(19) 0.0240(18) -0.0006(15) 0.0077(14) -0.0103(15) 
C25 0.0187(17) 0.0283(18) 0.0233(18) -0.0035(15) -0.0001(14) -0.0047(14) 
C26 0.0195(16) 0.0154(14) 0.0150(15) 0.0004(12) -0.0022(12) -0.0024(12) 
C27 0.0204(16) 0.0248(17) 0.0175(16) -0.0023(13) -0.0003(13) -0.0041(13) 
C28 0.0280(19) 0.0216(17) 0.0221(17) 0.0022(14) -0.0016(14) 0.0048(14) 
C29 0.0199(16) 0.0133(14) 0.0193(16) -0.0015(12) 0.0030(13) -0.0032(12) 
C30 0.038(2) 0.0168(16) 0.0218(18) -0.0053(14) 0.0049(15) -0.0090(15) 
C31 0.0306(19) 0.0219(17) 0.0186(17) -0.0013(14) 0.0071(14) -0.0032(14) 
C32 0.0121(15) 0.0146(14) 0.0194(16) -0.0028(13) 0.0061(12) -0.0011(12) 
C33 0.0083(14) 0.0155(15) 0.0209(16) 0.0016(13) 0.0018(12) 0.0038(11) 
 
_geom_special_details 
; 
 All esds (except the esd in the dihedral angle between two l.s. planes) 
 are estimated using the full covariance matrix.  The cell esds are taken 
 into account individually in the estimation of esds in distances, angles 
 and torsion angles; correlations between esds in cell parameters are only 
 used when they are defined by crystal symmetry.  An approximate (isotropic) 
 treatment of cell esds is used for estimating esds involving l.s. planes. 
; 
 
loop_ 
 _geom_bond_atom_site_label_1 
 _geom_bond_atom_site_label_2 
 _geom_bond_distance 
 _geom_bond_site_symmetry_2 
 _geom_bond_publ_flag 
U1 N1 2.238(3) . ? 
U1 N3 2.249(3) . ? 
U1 N2 2.252(3) . ? 
U1 N5 2.305(3) . ? 
U1 N4 2.613(3) . ? 
N1 C10 1.485(4) . ? 
N1 Si1 1.746(3) . ? 
N2 C21 1.490(4) . ? 
N2 Si2 1.749(3) . ? 
N3 C32 1.487(4) . ? 
N3 Si3 1.747(3) . ? 
N4 C22 1.477(4) . ? 
N4 C33 1.490(4) . ? 
N4 C11 1.490(4) . ? 
N5 N6 1.187(5) . ? 
N6 N7 1.161(6) . ? 
Si1 C7 1.893(3) . ? 
Si1 C4 1.898(3) . ? 
Si1 C1 1.904(3) . ? 
Si2 C12 1.895(3) . ? 
Si2 C18 1.902(3) . ? 
Si2 C15 1.902(3) . ? 
Si3 C29 1.895(3) . ? 
Si3 C26 1.900(3) . ? 
Si3 C23 1.901(3) . ? 
C1 C2 1.528(5) . ? 
C1 C3 1.537(5) . ? 
C1 H1 1.0000 . ? 
C2 H2A 0.9800 . ? 
C2 H2B 0.9800 . ? 
C2 H2C 0.9800 . ? 
C3 H3A 0.9800 . ? 
C3 H3B 0.9800 . ? 
C3 H3C 0.9800 . ? 
C4 C6 1.536(5) . ? 
C4 C5 1.540(5) . ? 
C4 H4 1.0000 . ? 
C5 H5A 0.9800 . ? 
C5 H5B 0.9800 . ? 
C5 H5C 0.9800 . ? 
C6 H6A 0.9800 . ? 
C6 H6B 0.9800 . ? 
C6 H6C 0.9800 . ? 
C7 C9 1.524(5) . ? 
C7 C8 1.538(5) . ? 
C7 H7 1.0000 . ? 
C8 H8A 0.9800 . ? 
C8 H8B 0.9800 . ? 
C8 H8C 0.9800 . ? 
C9 H9A 0.9800 . ? 
C9 H9B 0.9800 . ? 
C9 H9C 0.9800 . ? 
C10 C11 1.517(4) . ? 
C10 H10A 0.9900 . ? 
C10 H10B 0.9900 . ? 
C11 H11A 0.9900 . ? 
C11 H11B 0.9900 . ? 
C12 C13 1.540(5) . ? 
C12 C14 1.541(5) . ? 
C12 H12 1.0000 . ? 
C13 H13A 0.9800 . ? 
C13 H13B 0.9800 . ? 
C13 H13C 0.9800 . ? 
C14 H14A 0.9800 . ? 
C14 H14B 0.9800 . ? 
C14 H14C 0.9800 . ? 
C15 C17 1.535(5) . ? 
C15 C16 1.542(5) . ? 
C15 H15 1.0000 . ? 
C16 H16A 0.9800 . ? 
C16 H16B 0.9800 . ? 
C16 H16C 0.9800 . ? 
C17 H17A 0.9800 . ? 
C17 H17B 0.9800 . ? 
C17 H17C 0.9800 . ? 
C18 C20 1.530(5) . ? 
C18 C19 1.542(5) . ? 
C18 H18 1.0000 . ? 
C19 H19A 0.9800 . ? 
C19 H19B 0.9800 . ? 
C19 H19C 0.9800 . ? 
C20 H20A 0.9800 . ? 
C20 H20B 0.9800 . ? 
C20 H20C 0.9800 . ? 
C21 C22 1.511(5) . ? 
C21 H21A 0.9900 . ? 
C21 H21B 0.9900 . ? 
C22 H22A 0.9900 . ? 
C22 H22B 0.9900 . ? 
C23 C24 1.538(5) . ? 
C23 C25 1.540(5) . ? 
C23 H23 1.0000 . ? 
C24 H24A 0.9800 . ? 
C24 H24B 0.9800 . ? 
C24 H24C 0.9800 . ? 
C25 H25A 0.9800 . ? 
C25 H25B 0.9800 . ? 
C25 H25C 0.9800 . ? 
C26 C28 1.535(5) . ? 
C26 C27 1.540(5) . ? 
C26 H26 1.0000 . ? 
C27 H27A 0.9800 . ? 
C27 H27B 0.9800 . ? 
C27 H27C 0.9800 . ? 
C28 H28A 0.9800 . ? 
C28 H28B 0.9800 . ? 
C28 H28C 0.9800 . ? 
C29 C31 1.532(5) . ? 
C29 C30 1.541(5) . ? 
C29 H29 1.0000 . ? 
C30 H30A 0.9800 . ? 
C30 H30B 0.9800 . ? 
C30 H30C 0.9800 . ? 
C31 H31A 0.9800 . ? 
C31 H31B 0.9800 . ? 
C31 H31C 0.9800 . ? 
C32 C33 1.516(5) . ? 
C32 H32A 0.9900 . ? 
C32 H32B 0.9900 . ? 
C33 H33A 0.9900 . ? 
C33 H33B 0.9900 . ? 
 
loop_ 
 _geom_angle_atom_site_label_1 
 _geom_angle_atom_site_label_2 
 _geom_angle_atom_site_label_3 
 _geom_angle 
 _geom_angle_site_symmetry_1 
 _geom_angle_site_symmetry_3 
 _geom_angle_publ_flag 
N1 U1 N3 107.27(10) . . ? 
N1 U1 N2 111.80(10) . . ? 
N3 U1 N2 110.49(10) . . ? 
N1 U1 N5 106.64(10) . . ? 
N3 U1 N5 112.50(10) . . ? 
N2 U1 N5 108.13(10) . . ? 
N1 U1 N4 70.03(9) . . ? 
N3 U1 N4 71.31(9) . . ? 
N2 U1 N4 71.43(9) . . ? 
N5 U1 N4 175.79(9) . . ? 
C10 N1 Si1 117.8(2) . . ? 
C10 N1 U1 117.31(19) . . ? 
Si1 N1 U1 124.80(13) . . ? 
C21 N2 Si2 114.0(2) . . ? 
C21 N2 U1 115.38(19) . . ? 
Si2 N2 U1 130.53(14) . . ? 
C32 N3 Si3 116.0(2) . . ? 
C32 N3 U1 116.1(2) . . ? 
Si3 N3 U1 127.82(14) . . ? 
C22 N4 C33 111.4(3) . . ? 
C22 N4 C11 110.4(2) . . ? 
C33 N4 C11 110.4(3) . . ? 
C22 N4 U1 107.73(19) . . ? 
C33 N4 U1 107.78(18) . . ? 
C11 N4 U1 109.08(19) . . ? 
N6 N5 U1 176.0(3) . . ? 
N7 N6 N5 179.1(6) . . ? 
N1 Si1 C7 111.22(14) . . ? 
N1 Si1 C4 112.49(13) . . ? 
C7 Si1 C4 105.49(15) . . ? 
N1 Si1 C1 105.75(14) . . ? 
C7 Si1 C1 109.33(15) . . ? 
C4 Si1 C1 112.63(15) . . ? 
N2 Si2 C12 108.02(14) . . ? 
N2 Si2 C18 111.80(15) . . ? 
C12 Si2 C18 106.89(16) . . ? 
N2 Si2 C15 110.59(14) . . ? 
C12 Si2 C15 113.50(15) . . ? 
C18 Si2 C15 106.03(15) . . ? 
N3 Si3 C29 111.08(14) . . ? 
N3 Si3 C26 111.68(14) . . ? 
C29 Si3 C26 106.59(15) . . ? 
N3 Si3 C23 106.89(14) . . ? 
C29 Si3 C23 114.35(15) . . ? 
C26 Si3 C23 106.22(15) . . ? 
C2 C1 C3 110.4(3) . . ? 
C2 C1 Si1 114.5(2) . . ? 
C3 C1 Si1 113.1(2) . . ? 
C2 C1 H1 106.0 . . ? 
C3 C1 H1 106.0 . . ? 
Si1 C1 H1 106.0 . . ? 
C1 C2 H2A 109.5 . . ? 
C1 C2 H2B 109.5 . . ? 
H2A C2 H2B 109.5 . . ? 
C1 C2 H2C 109.5 . . ? 
H2A C2 H2C 109.5 . . ? 
H2B C2 H2C 109.5 . . ? 
C1 C3 H3A 109.5 . . ? 
C1 C3 H3B 109.5 . . ? 
H3A C3 H3B 109.5 . . ? 
C1 C3 H3C 109.5 . . ? 
H3A C3 H3C 109.5 . . ? 
H3B C3 H3C 109.5 . . ? 
C6 C4 C5 110.4(3) . . ? 
C6 C4 Si1 111.3(2) . . ? 
C5 C4 Si1 116.3(2) . . ? 
C6 C4 H4 106.0 . . ? 
C5 C4 H4 106.0 . . ? 
Si1 C4 H4 106.0 . . ? 
C4 C5 H5A 109.5 . . ? 
C4 C5 H5B 109.5 . . ? 
H5A C5 H5B 109.5 . . ? 
C4 C5 H5C 109.5 . . ? 
H5A C5 H5C 109.5 . . ? 
H5B C5 H5C 109.5 . . ? 
C4 C6 H6A 109.5 . . ? 
C4 C6 H6B 109.5 . . ? 
H6A C6 H6B 109.5 . . ? 
C4 C6 H6C 109.5 . . ? 
H6A C6 H6C 109.5 . . ? 
H6B C6 H6C 109.5 . . ? 
C9 C7 C8 109.3(3) . . ? 
C9 C7 Si1 113.3(3) . . ? 
C8 C7 Si1 112.5(2) . . ? 
C9 C7 H7 107.1 . . ? 
C8 C7 H7 107.1 . . ? 
Si1 C7 H7 107.1 . . ? 
C7 C8 H8A 109.5 . . ? 
C7 C8 H8B 109.5 . . ? 
H8A C8 H8B 109.5 . . ? 
C7 C8 H8C 109.5 . . ? 
H8A C8 H8C 109.5 . . ? 
H8B C8 H8C 109.5 . . ? 
C7 C9 H9A 109.5 . . ? 
C7 C9 H9B 109.5 . . ? 
H9A C9 H9B 109.5 . . ? 
C7 C9 H9C 109.5 . . ? 
H9A C9 H9C 109.5 . . ? 
H9B C9 H9C 109.5 . . ? 
N1 C10 C11 108.9(3) . . ? 
N1 C10 H10A 109.9 . . ? 
C11 C10 H10A 109.9 . . ? 
N1 C10 H10B 109.9 . . ? 
C11 C10 H10B 109.9 . . ? 
H10A C10 H10B 108.3 . . ? 
N4 C11 C10 109.1(3) . . ? 
N4 C11 H11A 109.9 . . ? 
C10 C11 H11A 109.9 . . ? 
N4 C11 H11B 109.9 . . ? 
C10 C11 H11B 109.9 . . ? 
H11A C11 H11B 108.3 . . ? 
C13 C12 C14 109.0(3) . . ? 
C13 C12 Si2 114.0(2) . . ? 
C14 C12 Si2 113.1(2) . . ? 
C13 C12 H12 106.7 . . ? 
C14 C12 H12 106.7 . . ? 
Si2 C12 H12 106.7 . . ? 
C12 C13 H13A 109.5 . . ? 
C12 C13 H13B 109.5 . . ? 
H13A C13 H13B 109.5 . . ? 
C12 C13 H13C 109.5 . . ? 
H13A C13 H13C 109.5 . . ? 
H13B C13 H13C 109.5 . . ? 
C12 C14 H14A 109.5 . . ? 
C12 C14 H14B 109.5 . . ? 
H14A C14 H14B 109.5 . . ? 
C12 C14 H14C 109.5 . . ? 
H14A C14 H14C 109.5 . . ? 
H14B C14 H14C 109.5 . . ? 
C17 C15 C16 109.8(3) . . ? 
C17 C15 Si2 115.5(2) . . ? 
C16 C15 Si2 113.1(2) . . ? 
C17 C15 H15 105.9 . . ? 
C16 C15 H15 105.9 . . ? 
Si2 C15 H15 105.9 . . ? 
C15 C16 H16A 109.5 . . ? 
C15 C16 H16B 109.5 . . ? 
H16A C16 H16B 109.5 . . ? 
C15 C16 H16C 109.5 . . ? 
H16A C16 H16C 109.5 . . ? 
H16B C16 H16C 109.5 . . ? 
C15 C17 H17A 109.5 . . ? 
C15 C17 H17B 109.5 . . ? 
H17A C17 H17B 109.5 . . ? 
C15 C17 H17C 109.5 . . ? 
H17A C17 H17C 109.5 . . ? 
H17B C17 H17C 109.5 . . ? 
C20 C18 C19 109.7(3) . . ? 
C20 C18 Si2 115.2(3) . . ? 
C19 C18 Si2 112.2(2) . . ? 
C20 C18 H18 106.4 . . ? 
C19 C18 H18 106.4 . . ? 
Si2 C18 H18 106.4 . . ? 
C18 C19 H19A 109.5 . . ? 
C18 C19 H19B 109.5 . . ? 
H19A C19 H19B 109.5 . . ? 
C18 C19 H19C 109.5 . . ? 
H19A C19 H19C 109.5 . . ? 
H19B C19 H19C 109.5 . . ? 
C18 C20 H20A 109.5 . . ? 
C18 C20 H20B 109.5 . . ? 
H20A C20 H20B 109.5 . . ? 
C18 C20 H20C 109.5 . . ? 
H20A C20 H20C 109.5 . . ? 
H20B C20 H20C 109.5 . . ? 
N2 C21 C22 110.7(3) . . ? 
N2 C21 H21A 109.5 . . ? 
C22 C21 H21A 109.5 . . ? 
N2 C21 H21B 109.5 . . ? 
C22 C21 H21B 109.5 . . ? 
H21A C21 H21B 108.1 . . ? 
N4 C22 C21 109.6(3) . . ? 
N4 C22 H22A 109.7 . . ? 
C21 C22 H22A 109.7 . . ? 
N4 C22 H22B 109.7 . . ? 
C21 C22 H22B 109.7 . . ? 
H22A C22 H22B 108.2 . . ? 
C24 C23 C25 108.9(3) . . ? 
C24 C23 Si3 115.0(3) . . ? 
C25 C23 Si3 113.6(2) . . ? 
C24 C23 H23 106.2 . . ? 
C25 C23 H23 106.2 . . ? 
Si3 C23 H23 106.2 . . ? 
C23 C24 H24A 109.5 . . ? 
C23 C24 H24B 109.5 . . ? 
H24A C24 H24B 109.5 . . ? 
C23 C24 H24C 109.5 . . ? 
H24A C24 H24C 109.5 . . ? 
H24B C24 H24C 109.5 . . ? 
C23 C25 H25A 109.5 . . ? 
C23 C25 H25B 109.5 . . ? 
H25A C25 H25B 109.5 . . ? 
C23 C25 H25C 109.5 . . ? 
H25A C25 H25C 109.5 . . ? 
H25B C25 H25C 109.5 . . ? 
C28 C26 C27 109.7(3) . . ? 
C28 C26 Si3 114.3(2) . . ? 
C27 C26 Si3 110.6(2) . . ? 
C28 C26 H26 107.3 . . ? 
C27 C26 H26 107.3 . . ? 
Si3 C26 H26 107.3 . . ? 
C26 C27 H27A 109.5 . . ? 
C26 C27 H27B 109.5 . . ? 
H27A C27 H27B 109.5 . . ? 
C26 C27 H27C 109.5 . . ? 
H27A C27 H27C 109.5 . . ? 
H27B C27 H27C 109.5 . . ? 
C26 C28 H28A 109.5 . . ? 
C26 C28 H28B 109.5 . . ? 
H28A C28 H28B 109.5 . . ? 
C26 C28 H28C 109.5 . . ? 
H28A C28 H28C 109.5 . . ? 
H28B C28 H28C 109.5 . . ? 
C31 C29 C30 109.7(3) . . ? 
C31 C29 Si3 115.7(2) . . ? 
C30 C29 Si3 112.5(2) . . ? 
C31 C29 H29 106.1 . . ? 
C30 C29 H29 106.1 . . ? 
Si3 C29 H29 106.1 . . ? 
C29 C30 H30A 109.5 . . ? 
C29 C30 H30B 109.5 . . ? 
H30A C30 H30B 109.5 . . ? 
C29 C30 H30C 109.5 . . ? 
H30A C30 H30C 109.5 . . ? 
H30B C30 H30C 109.5 . . ? 
C29 C31 H31A 109.5 . . ? 
C29 C31 H31B 109.5 . . ? 
H31A C31 H31B 109.5 . . ? 
C29 C31 H31C 109.5 . . ? 
H31A C31 H31C 109.5 . . ? 
H31B C31 H31C 109.5 . . ? 
N3 C32 C33 110.4(3) . . ? 
N3 C32 H32A 109.6 . . ? 
C33 C32 H32A 109.6 . . ? 
N3 C32 H32B 109.6 . . ? 
C33 C32 H32B 109.6 . . ? 
H32A C32 H32B 108.1 . . ? 
N4 C33 C32 109.4(3) . . ? 
N4 C33 H33A 109.8 . . ? 
C32 C33 H33A 109.8 . . ? 
N4 C33 H33B 109.8 . . ? 
C32 C33 H33B 109.8 . . ? 
H33A C33 H33B 108.2 . . ? 
 
loop_ 
 _geom_torsion_atom_site_label_1 
 _geom_torsion_atom_site_label_2 
 _geom_torsion_atom_site_label_3 
 _geom_torsion_atom_site_label_4 
 _geom_torsion 
 _geom_torsion_site_symmetry_1 
 _geom_torsion_site_symmetry_2 
 _geom_torsion_site_symmetry_3 
 _geom_torsion_site_symmetry_4 
 _geom_torsion_publ_flag 
N3 U1 N1 C10 -86.7(2) . . . . ? 
N2 U1 N1 C10 34.5(2) . . . . ? 
N5 U1 N1 C10 152.5(2) . . . . ? 
N4 U1 N1 C10 -24.8(2) . . . . ? 
N3 U1 N1 Si1 97.44(17) . . . . ? 
N2 U1 N1 Si1 -141.29(16) . . . . ? 
N5 U1 N1 Si1 -23.30(19) . . . . ? 
N4 U1 N1 Si1 159.40(19) . . . . ? 
N1 U1 N2 C21 -79.7(2) . . . . ? 
N3 U1 N2 C21 39.7(2) . . . . ? 
N5 U1 N2 C21 163.2(2) . . . . ? 
N4 U1 N2 C21 -21.2(2) . . . . ? 
N1 U1 N2 Si2 97.54(19) . . . . ? 
N3 U1 N2 Si2 -143.06(18) . . . . ? 
N5 U1 N2 Si2 -19.5(2) . . . . ? 
N4 U1 N2 Si2 156.0(2) . . . . ? 
N1 U1 N3 C32 39.7(2) . . . . ? 
N2 U1 N3 C32 -82.4(2) . . . . ? 
N5 U1 N3 C32 156.6(2) . . . . ? 
N4 U1 N3 C32 -21.4(2) . . . . ? 
N1 U1 N3 Si3 -144.59(17) . . . . ? 
N2 U1 N3 Si3 93.31(19) . . . . ? 
N5 U1 N3 Si3 -27.6(2) . . . . ? 
N4 U1 N3 Si3 154.3(2) . . . . ? 
N1 U1 N4 C22 114.3(2) . . . . ? 
N3 U1 N4 C22 -128.5(2) . . . . ? 
N2 U1 N4 C22 -8.31(18) . . . . ? 
N1 U1 N4 C33 -125.4(2) . . . . ? 
N3 U1 N4 C33 -8.27(19) . . . . ? 
N2 U1 N4 C33 112.0(2) . . . . ? 
N1 U1 N4 C11 -5.54(18) . . . . ? 
N3 U1 N4 C11 111.6(2) . . . . ? 
N2 U1 N4 C11 -128.2(2) . . . . ? 
C10 N1 Si1 C7 -83.8(3) . . . . ? 
U1 N1 Si1 C7 91.96(19) . . . . ? 
C10 N1 Si1 C4 34.2(3) . . . . ? 
U1 N1 Si1 C4 -149.96(16) . . . . ? 
C10 N1 Si1 C1 157.6(2) . . . . ? 
U1 N1 Si1 C1 -26.6(2) . . . . ? 
C21 N2 Si2 C12 -168.2(2) . . . . ? 
U1 N2 Si2 C12 14.5(2) . . . . ? 
C21 N2 Si2 C18 74.5(3) . . . . ? 
U1 N2 Si2 C18 -102.8(2) . . . . ? 
C21 N2 Si2 C15 -43.4(3) . . . . ? 
U1 N2 Si2 C15 139.29(18) . . . . ? 
C32 N3 Si3 C29 -39.8(3) . . . . ? 
U1 N3 Si3 C29 144.48(18) . . . . ? 
C32 N3 Si3 C26 79.1(3) . . . . ? 
U1 N3 Si3 C26 -96.7(2) . . . . ? 
C32 N3 Si3 C23 -165.2(2) . . . . ? 
U1 N3 Si3 C23 19.1(2) . . . . ? 
N1 Si1 C1 C2 151.8(3) . . . . ? 
C7 Si1 C1 C2 32.0(3) . . . . ? 
C4 Si1 C1 C2 -84.9(3) . . . . ? 
N1 Si1 C1 C3 -80.5(3) . . . . ? 
C7 Si1 C1 C3 159.7(2) . . . . ? 
C4 Si1 C1 C3 42.8(3) . . . . ? 
N1 Si1 C4 C6 176.0(2) . . . . ? 
C7 Si1 C4 C6 -62.6(3) . . . . ? 
C1 Si1 C4 C6 56.6(3) . . . . ? 
N1 Si1 C4 C5 48.4(3) . . . . ? 
C7 Si1 C4 C5 169.8(3) . . . . ? 
C1 Si1 C4 C5 -71.0(3) . . . . ? 
N1 Si1 C7 C9 -56.0(3) . . . . ? 
C4 Si1 C7 C9 -178.2(3) . . . . ? 
C1 Si1 C7 C9 60.4(3) . . . . ? 
N1 Si1 C7 C8 68.6(3) . . . . ? 
C4 Si1 C7 C8 -53.7(3) . . . . ? 
C1 Si1 C7 C8 -175.0(3) . . . . ? 
Si1 N1 C10 C11 -131.0(2) . . . . ? 
U1 N1 C10 C11 52.9(3) . . . . ? 
C22 N4 C11 C10 -85.4(3) . . . . ? 
C33 N4 C11 C10 151.0(3) . . . . ? 
U1 N4 C11 C10 32.8(3) . . . . ? 
N1 C10 C11 N4 -54.6(3) . . . . ? 
N2 Si2 C12 C13 -156.8(2) . . . . ? 
C18 Si2 C12 C13 -36.4(3) . . . . ? 
C15 Si2 C12 C13 80.2(3) . . . . ? 
N2 Si2 C12 C14 77.8(3) . . . . ? 
C18 Si2 C12 C14 -161.7(2) . . . . ? 
C15 Si2 C12 C14 -45.2(3) . . . . ? 
N2 Si2 C15 C17 -52.7(3) . . . . ? 
C12 Si2 C15 C17 68.9(3) . . . . ? 
C18 Si2 C15 C17 -174.1(2) . . . . ? 
N2 Si2 C15 C16 179.6(2) . . . . ? 
C12 Si2 C15 C16 -58.9(3) . . . . ? 
C18 Si2 C15 C16 58.2(3) . . . . ? 
N2 Si2 C18 C20 -72.2(3) . . . . ? 
C12 Si2 C18 C20 169.8(3) . . . . ? 
C15 Si2 C18 C20 48.4(3) . . . . ? 
N2 Si2 C18 C19 54.3(3) . . . . ? 
C12 Si2 C18 C19 -63.7(3) . . . . ? 
C15 Si2 C18 C19 174.9(3) . . . . ? 
Si2 N2 C21 C22 -127.9(2) . . . . ? 
U1 N2 C21 C22 49.8(3) . . . . ? 
C33 N4 C22 C21 -82.8(3) . . . . ? 
C11 N4 C22 C21 154.2(3) . . . . ? 
U1 N4 C22 C21 35.2(3) . . . . ? 
N2 C21 C22 N4 -56.3(3) . . . . ? 
N3 Si3 C23 C24 -157.5(2) . . . . ? 
C29 Si3 C23 C24 79.1(3) . . . . ? 
C26 Si3 C23 C24 -38.1(3) . . . . ? 
N3 Si3 C23 C25 76.0(3) . . . . ? 
C29 Si3 C23 C25 -47.3(3) . . . . ? 
C26 Si3 C23 C25 -164.6(2) . . . . ? 
N3 Si3 C26 C28 -68.5(3) . . . . ? 
C29 Si3 C26 C28 53.0(3) . . . . ? 
C23 Si3 C26 C28 175.3(2) . . . . ? 
N3 Si3 C26 C27 55.9(3) . . . . ? 
C29 Si3 C26 C27 177.4(2) . . . . ? 
C23 Si3 C26 C27 -60.3(3) . . . . ? 
N3 Si3 C29 C31 -49.2(3) . . . . ? 
C26 Si3 C29 C31 -171.1(3) . . . . ? 
C23 Si3 C29 C31 71.9(3) . . . . ? 
N3 Si3 C29 C30 -176.4(2) . . . . ? 
C26 Si3 C29 C30 61.7(3) . . . . ? 
C23 Si3 C29 C30 -55.4(3) . . . . ? 
Si3 N3 C32 C33 -126.3(2) . . . . ? 
U1 N3 C32 C33 50.0(3) . . . . ? 
C22 N4 C33 C32 153.0(3) . . . . ? 
C11 N4 C33 C32 -84.0(3) . . . . ? 
U1 N4 C33 C32 35.1(3) . . . . ? 
N3 C32 C33 N4 -55.9(4) . . . . ? 
 
_diffrn_measured_fraction_theta_max    0.975 
_diffrn_reflns_theta_full              67.50 
_diffrn_measured_fraction_theta_full   0.998 
_refine_diff_density_max    1.719 
_refine_diff_density_min   -1.897 
_refine_diff_density_rms    0.116 
