# Supplementary material for: Isolation and characterization of a uranium(VI)–nitride triple bond
Source: Springer Nature journal article supplement (doi:10.1038/nchem.1642), 2013-05-03
Supplement: 41557_2013_BFnchem1642_MOESM21_ESM.mol [file 41557_2013_BFnchem1642_MOESM21_ESM.mol]

  ChemDraw04181311032D

 44 41  0  0  0  0  0  0  0  0999 V2000
   -1.0029    0.9766    0.0000 C   0  0  0  0  0  0  0  0  0  0  0  0
   -0.2508    1.0841    0.0000 C   0  0  0  0  0  0  0  0  0  0  0  0
    1.0898    1.2587    0.0000 Si  0  0  0  0  0  0  0  0  0  0  0  0
   -0.2089   -1.2726    0.0000 N   0  5  0  0  0  0  0  0  0  0  0  0
    0.3560    0.4896    0.0000 N   0  5  0  0  0  0  0  0  0  0  0  0
   -1.1084    2.0062    0.0000 Si  0  0  0  0  0  0  0  0  0  0  0  0
   -0.0838   -2.1327    0.0000 Si  0  0  0  0  0  0  0  0  0  0  0  0
   -1.2408    0.5720    0.0000 C   0  0  0  0  0  0  0  0  0  0  0  0
   -1.4791    0.2238    0.0000 C   0  0  0  0  0  0  0  0  0  0  0  0
   -1.3798   -0.4443    0.0000 N   0  0  0  0  0  0  0  0  0  0  0  0
   -0.9743   -1.3779    0.0000 C   0  0  0  0  0  0  0  0  0  0  0  0
   -1.5668   -1.0237    0.0000 C   0  0  0  0  0  0  0  0  0  0  0  0
   -0.4495    0.5975    0.0000 N   0  5  0  0  0  0  0  0  0  0  0  0
    0.7882    1.9036    0.0000 C   0  0  0  0  0  0  0  0  0  0  0  0
    1.7138    2.0741    0.0000 C   0  0  0  0  0  0  0  0  0  0  0  0
    1.9144    1.2344    0.0000 C   0  0  0  0  0  0  0  0  0  0  0  0
   -1.8674    1.6829    0.0000 C   0  0  0  0  0  0  0  0  0  0  0  0
   -0.6127    2.6657    0.0000 C   0  0  0  0  0  0  0  0  0  0  0  0
   -1.5259    2.6939    0.0000 C   0  0  0  0  0  0  0  0  0  0  0  0
    0.1297   -2.9296    0.0000 C   0  0  0  0  0  0  0  0  0  0  0  0
   -0.7983   -2.5452    0.0000 C   0  0  0  0  0  0  0  0  0  0  0  0
    0.7131   -2.0024    0.0000 C   0  0  0  0  0  0  0  0  0  0  0  0
    1.2965   -2.5858    0.0000 C   0  0  0  0  0  0  0  0  0  0  0  0
    1.1256   -1.2880    0.0000 C   0  0  0  0  0  0  0  0  0  0  0  0
    0.9266   -3.1431    0.0000 C   0  0  0  0  0  0  0  0  0  0  0  0
   -0.4536   -3.5129    0.0000 C   0  0  0  0  0  0  0  0  0  0  0  0
   -1.5127   -2.1327    0.0000 C   0  0  0  0  0  0  0  0  0  0  0  0
   -0.7983   -3.3702    0.0000 C   0  0  0  0  0  0  0  0  0  0  0  0
    0.2063    2.5661    0.0000 C   0  0  0  0  0  0  0  0  0  0  0  0
   -2.3427    2.5780    0.0000 C   0  0  0  0  0  0  0  0  0  0  0  0
   -0.7285    3.4825    0.0000 C   0  0  0  0  0  0  0  0  0  0  0  0
   -1.4264    3.5129    0.0000 C   0  0  0  0  0  0  0  0  0  0  0  0
   -2.5269    2.1786    0.0000 C   0  0  0  0  0  0  0  0  0  0  0  0
   -1.9669    0.8639    0.0000 C   0  0  0  0  0  0  0  0  0  0  0  0
    0.0142    2.1890    0.0000 C   0  0  0  0  0  0  0  0  0  0  0  0
    1.0737    2.6776    0.0000 C   0  0  0  0  0  0  0  0  0  0  0  0
    2.5269    2.2139    0.0000 C   0  0  0  0  0  0  0  0  0  0  0  0
    1.3827    2.8297    0.0000 C   0  0  0  0  0  0  0  0  0  0  0  0
    2.3057    0.5081    0.0000 C   0  0  0  0  0  0  0  0  0  0  0  0
    2.3478    1.9364    0.0000 C   0  0  0  0  0  0  0  0  0  0  0  0
   -0.1221   -0.5079    0.0000 U   0  0  0  0  0  0  0  0  0  0  0  0
    1.0379   -0.4800    0.0000 N   0  5  0  0  0  0  0  0  0  0  0  0
    1.7355   -0.8566    0.0000 N   0  3  0  0  0  0  0  0  0  0  0  0
    2.4500   -1.2691    0.0000 N   0  5  0  0  0  0  0  0  0  0  0  0
 10  1  1  0      
  1  2  1  0      
  2  5  1  0      
  5  3  1  0      
 13  6  1  0      
  4  7  1  0      
 13  8  1  0      
  8  9  1  0      
  9 10  1  0      
 12 11  1  0      
 11  4  1  0      
 10 12  1  0      
  3 14  1  0      
  3 15  1  0      
  3 16  1  0      
  6 17  1  0      
  6 18  1  0      
  6 19  1  0      
  7 20  1  0      
  7 21  1  0      
  7 22  1  0      
 22 23  1  0      
 22 24  1  0      
 20 25  1  0      
 20 26  1  0      
 21 27  1  0      
 21 28  1  0      
 18 29  1  0      
 19 30  1  0      
 18 31  1  0      
 19 32  1  0      
 17 33  1  0      
 17 34  1  0      
 14 35  1  0      
 14 36  1  0      
 15 37  1  0      
 15 38  1  0      
 16 39  1  0      
 16 40  1  0      
 43 44  2  0      
 42 43  2  0      
M  CHG  7   4  -1   5  -1  13  -1  41   4  42  -1  43   1  44  -1
M  END
